# Supplementary material
Source: Springer Nature journal article supplement (https://www.springermedizin.de/resource/supplementary/12865_2006_116_MOESM6_ESM.pdf/9428586)

**A.**

— CD3/CD28  
— CD3/CD28 + ICAM1  
— CD3/CD28 + ICAM2  
— CD3/CD28 + ICAM3

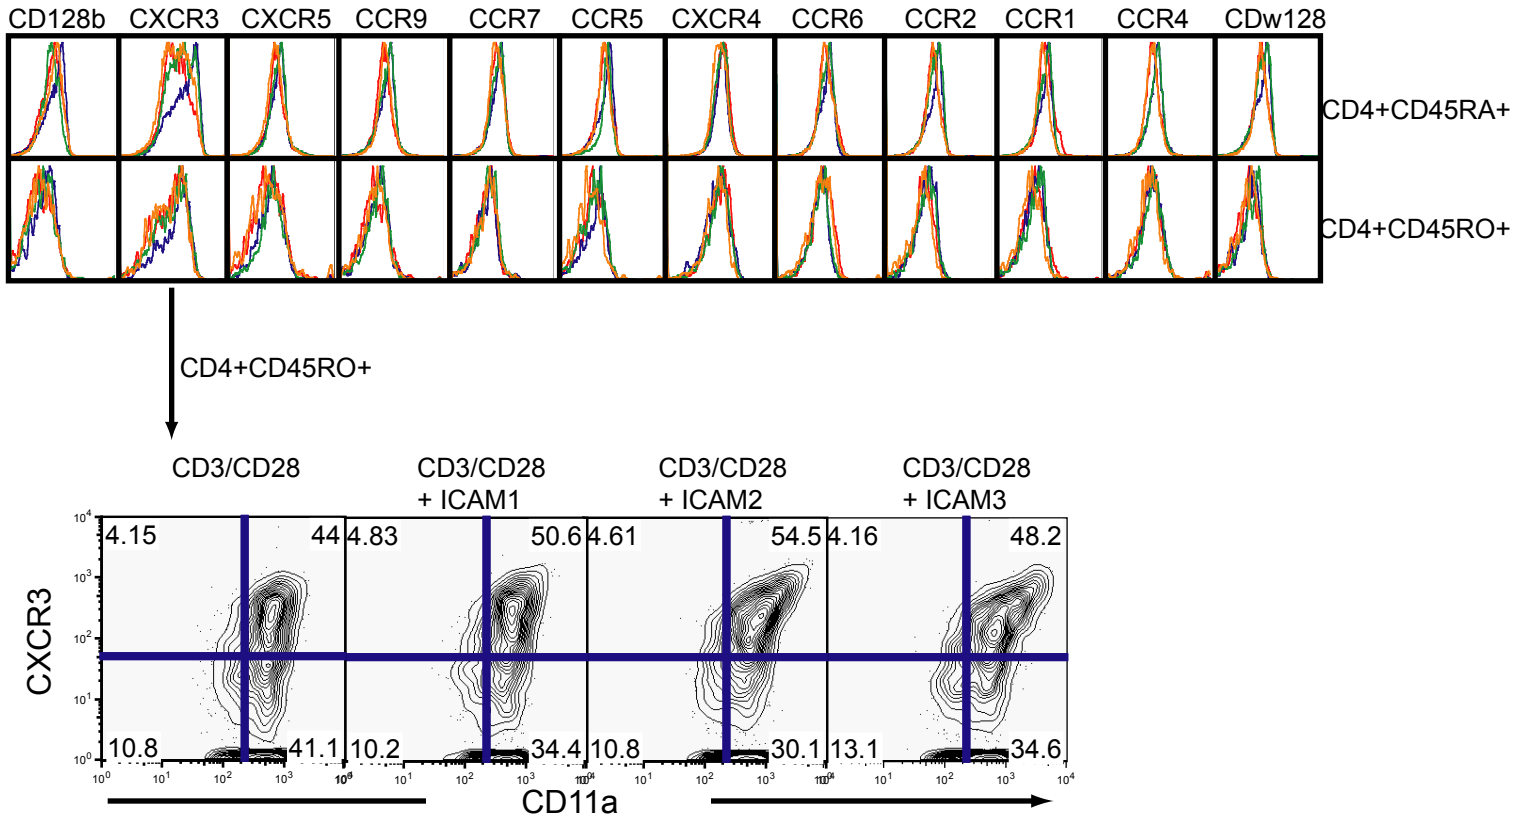

**B.**

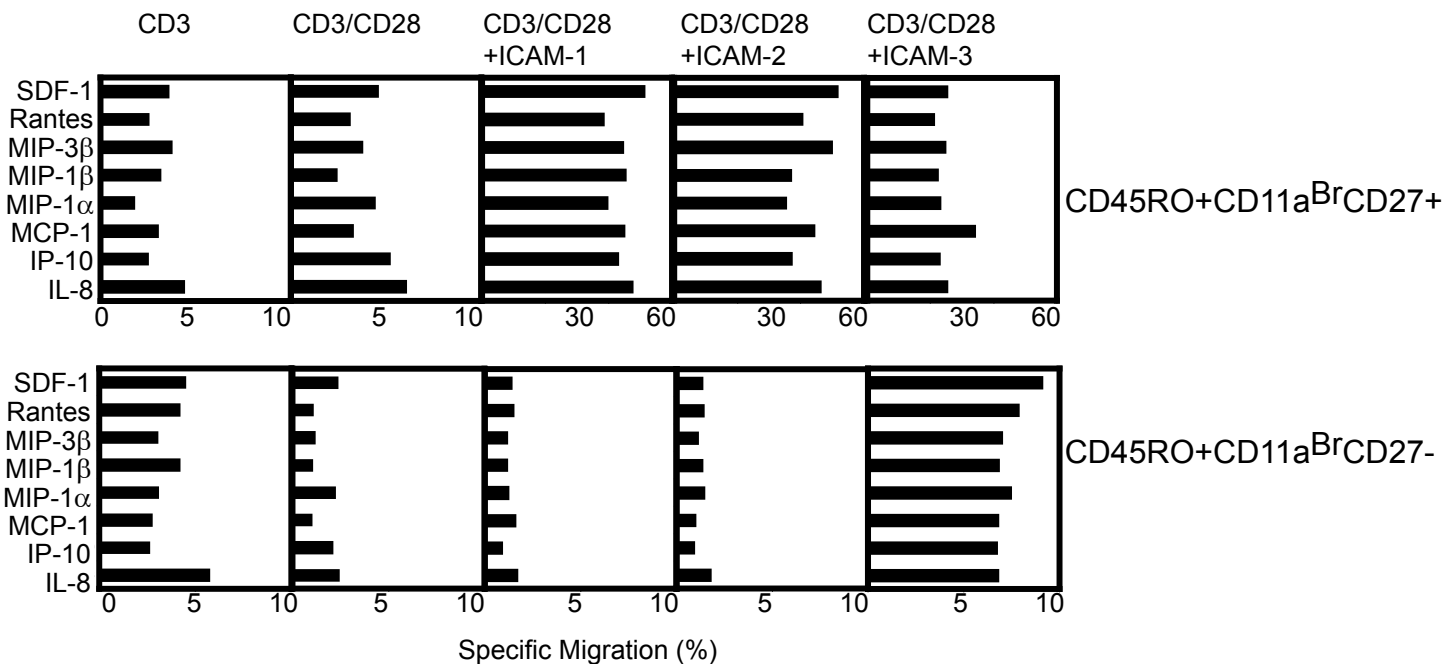

Supplement: MOESM6 [file 9428586]
